# Supplementary material
Source: PubMed Central journal article supplement (PMC7366273)
Supplement: Supp_Fig1.pdf [file Supp_Fig1.pdf]

## Supplementary Data

### Behavioral test battery timeline

#### Behavioral test battery 1

1 day after the second RUS

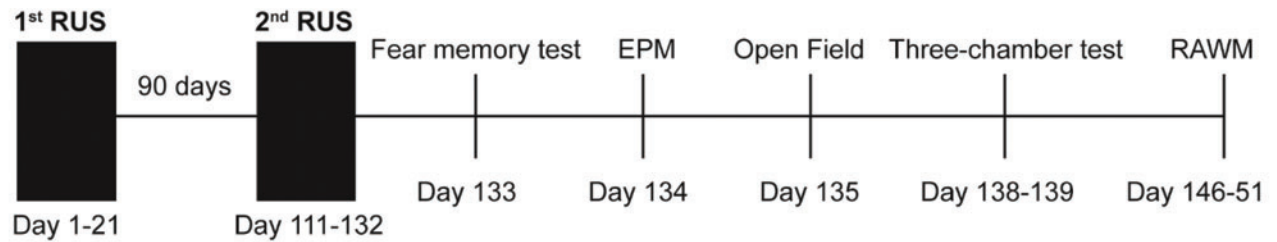

#### Behavioral test battery 2

3 months after the second RUS

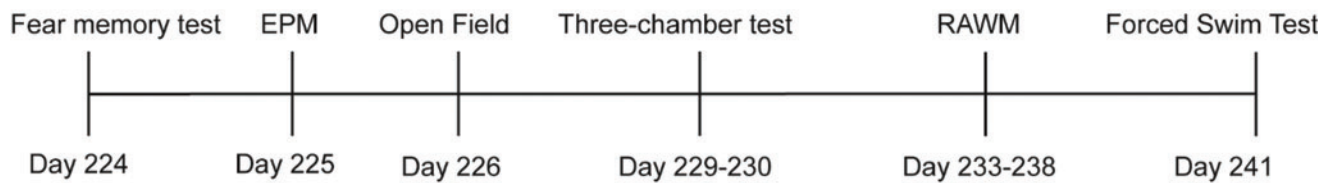

**SUPPLEMENTARY FIG. S1.** Timeline of behavioral test batteries. The same animals were retested at behavioral test battery 2.
