# Supplementary material
Source: PubMed Central journal article supplement (PMC7366273)
Supplement: Supp_Fig5.pdf [file Supp_Fig5.pdf]

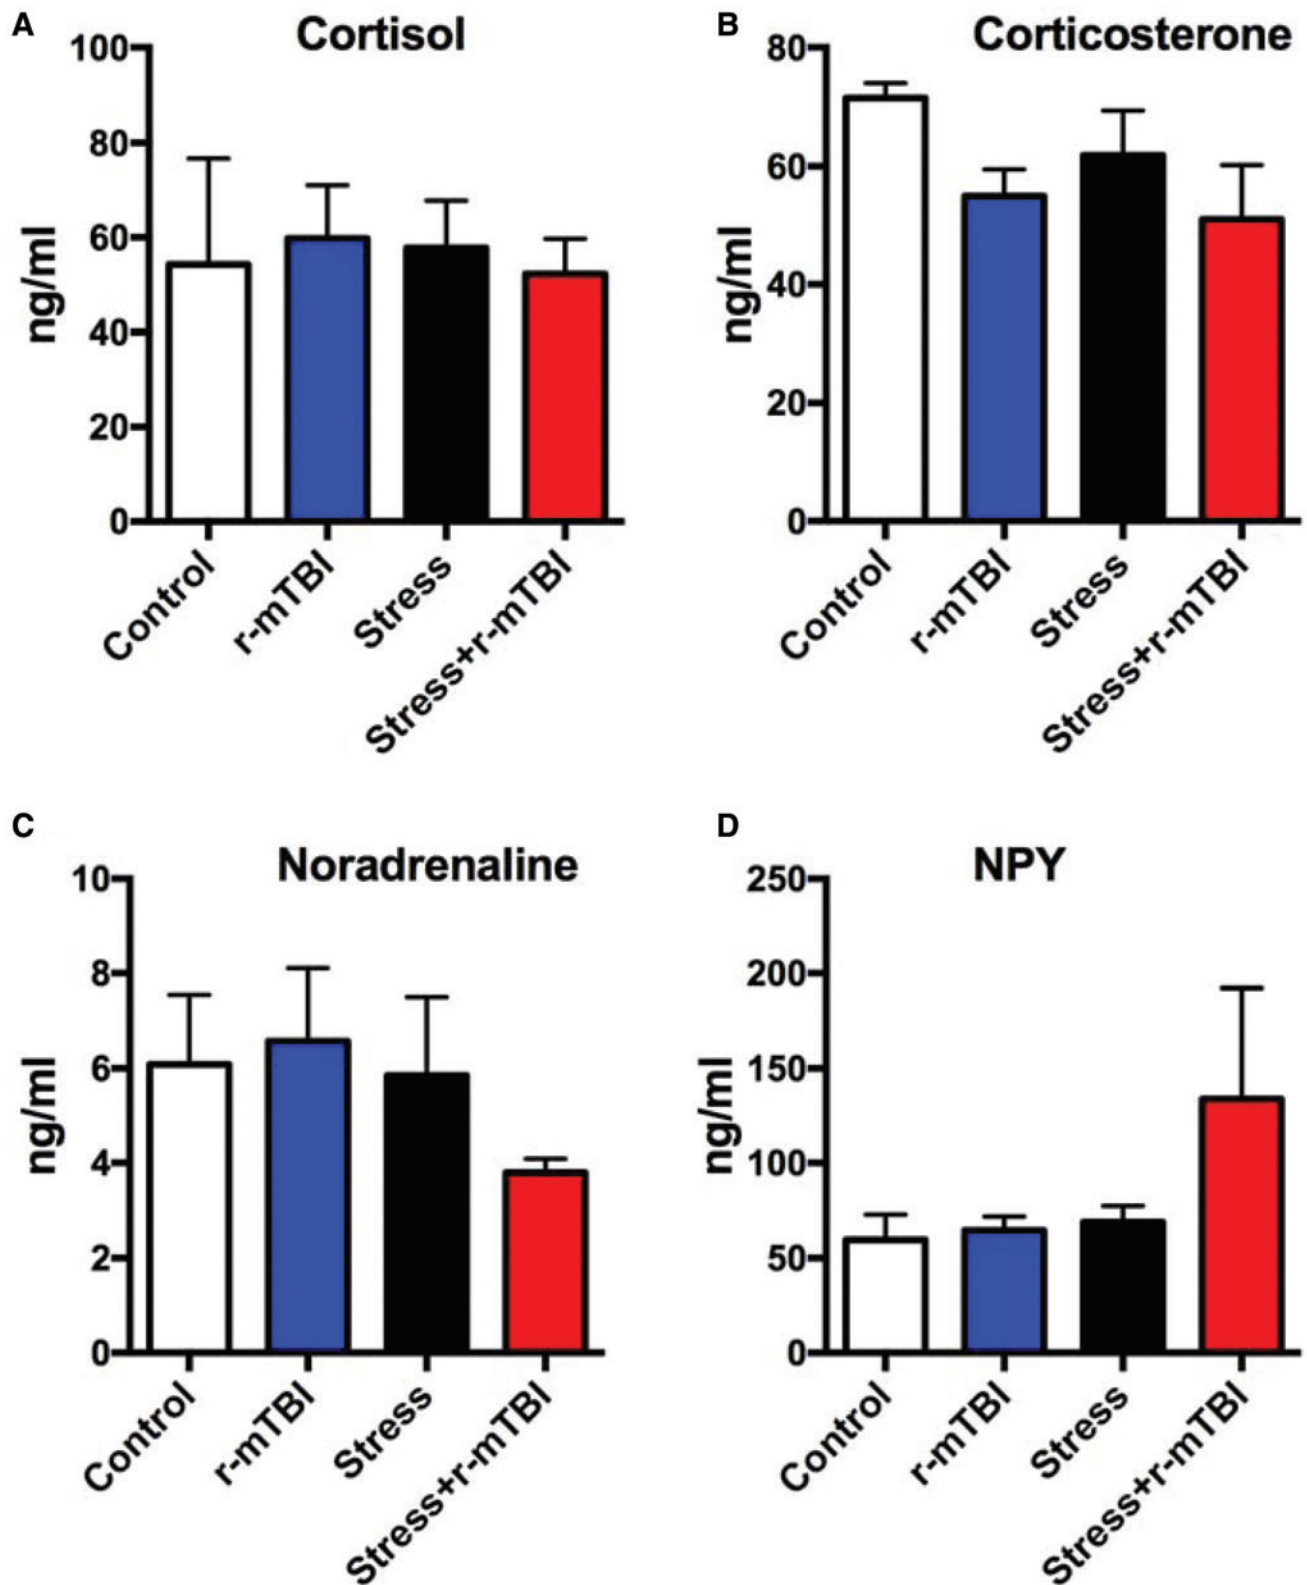

**SUPPLEMENTARY FIG. S5.** Profiling of plasma stress markers at the acute time-point. No changes in plasma levels of cortisol (A), corticosterone (B), noradrenaline (C), and neuropeptide Y (D) were observed at the acute time-point. Data in (A-D) were analyzed using two-way analysis of variance followed by two-stage linear step-up procedure of Benjamini, Krieger and Yekutieli to correct for multiple comparisons. A total of 3–5 plasma samples per group were used at the acute time-point.
