# Supplementary material
Source: PubMed Central journal article supplement (PMC7366273)
Supplement: Supp_Fig6.pdf [file Supp_Fig6.pdf]

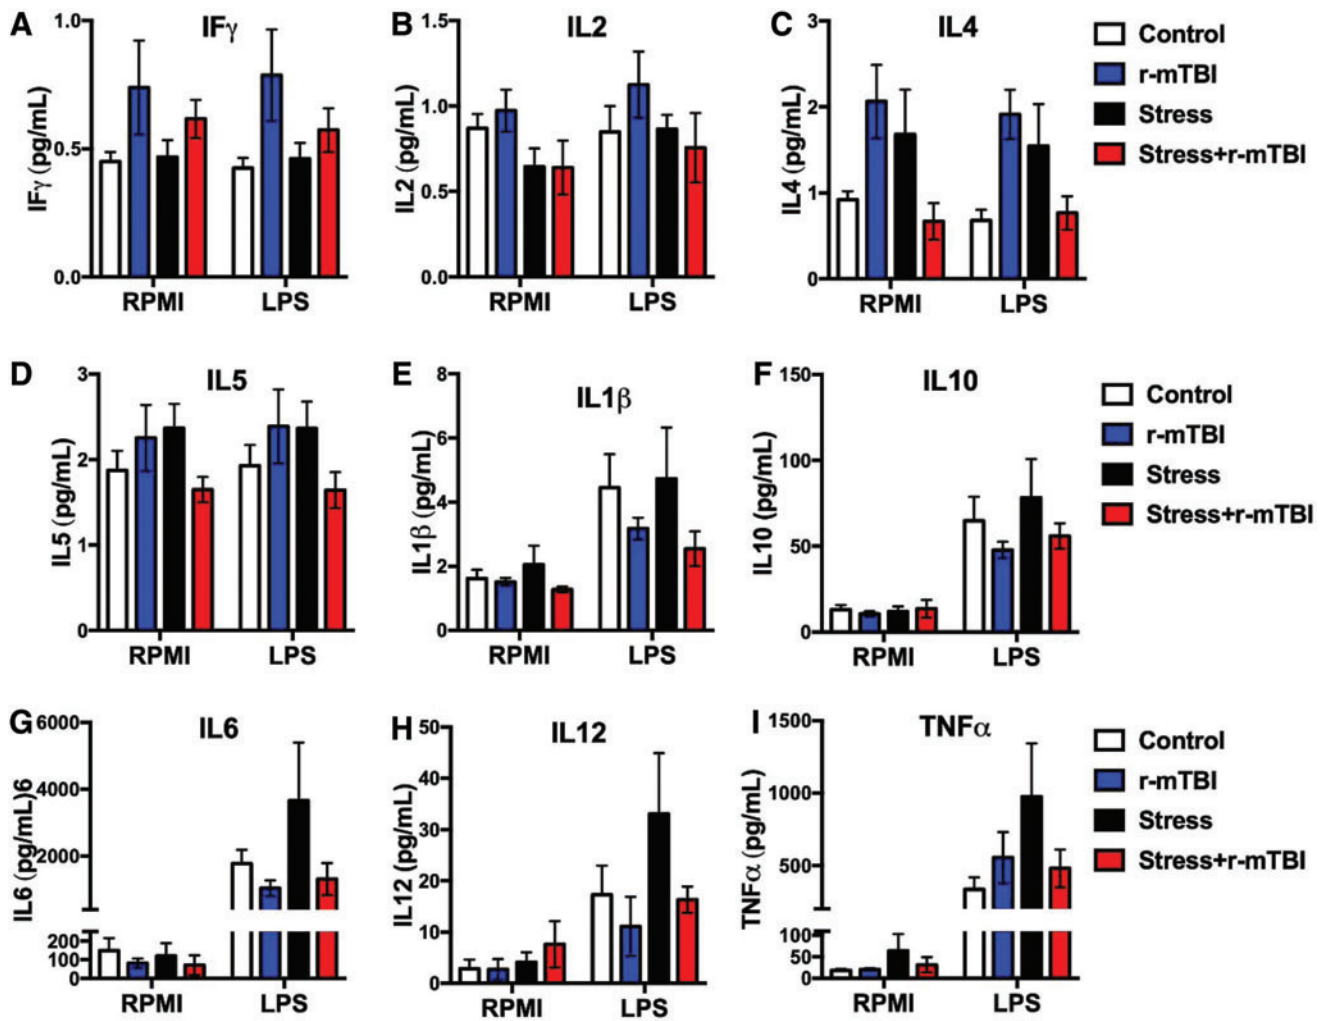

**SUPPLEMENTARY FIG. S6.** Effect of stress and repetitive mild traumatic brain injury (r-mTBI) on LPS-induced cytokine production in whole blood. Plasma levels of IF $\gamma$  (A), interleukin (IL)-2 (B), IL-4 (C), and IL-5 (D) were not altered after incubating whole blood with LPS for 6 h. On the contrary, the production levels of IL-1 $\beta$  (E), IL-10 (F), IL-6 (G), IL-12 (H), and TNF $\alpha$  (I) were increased 6 h after LPS stimulation. No stress or r-mTBI effects were observed in any group after LPS stimulation. Data were analyzed using three-way repeated measures analysis of variance ( $n=5-6$ ).
