# Supplementary material
Source: PubMed Central journal article supplement (PMC7366273)
Supplement: Supp_Fig7.pdf [file Supp_Fig7.pdf]

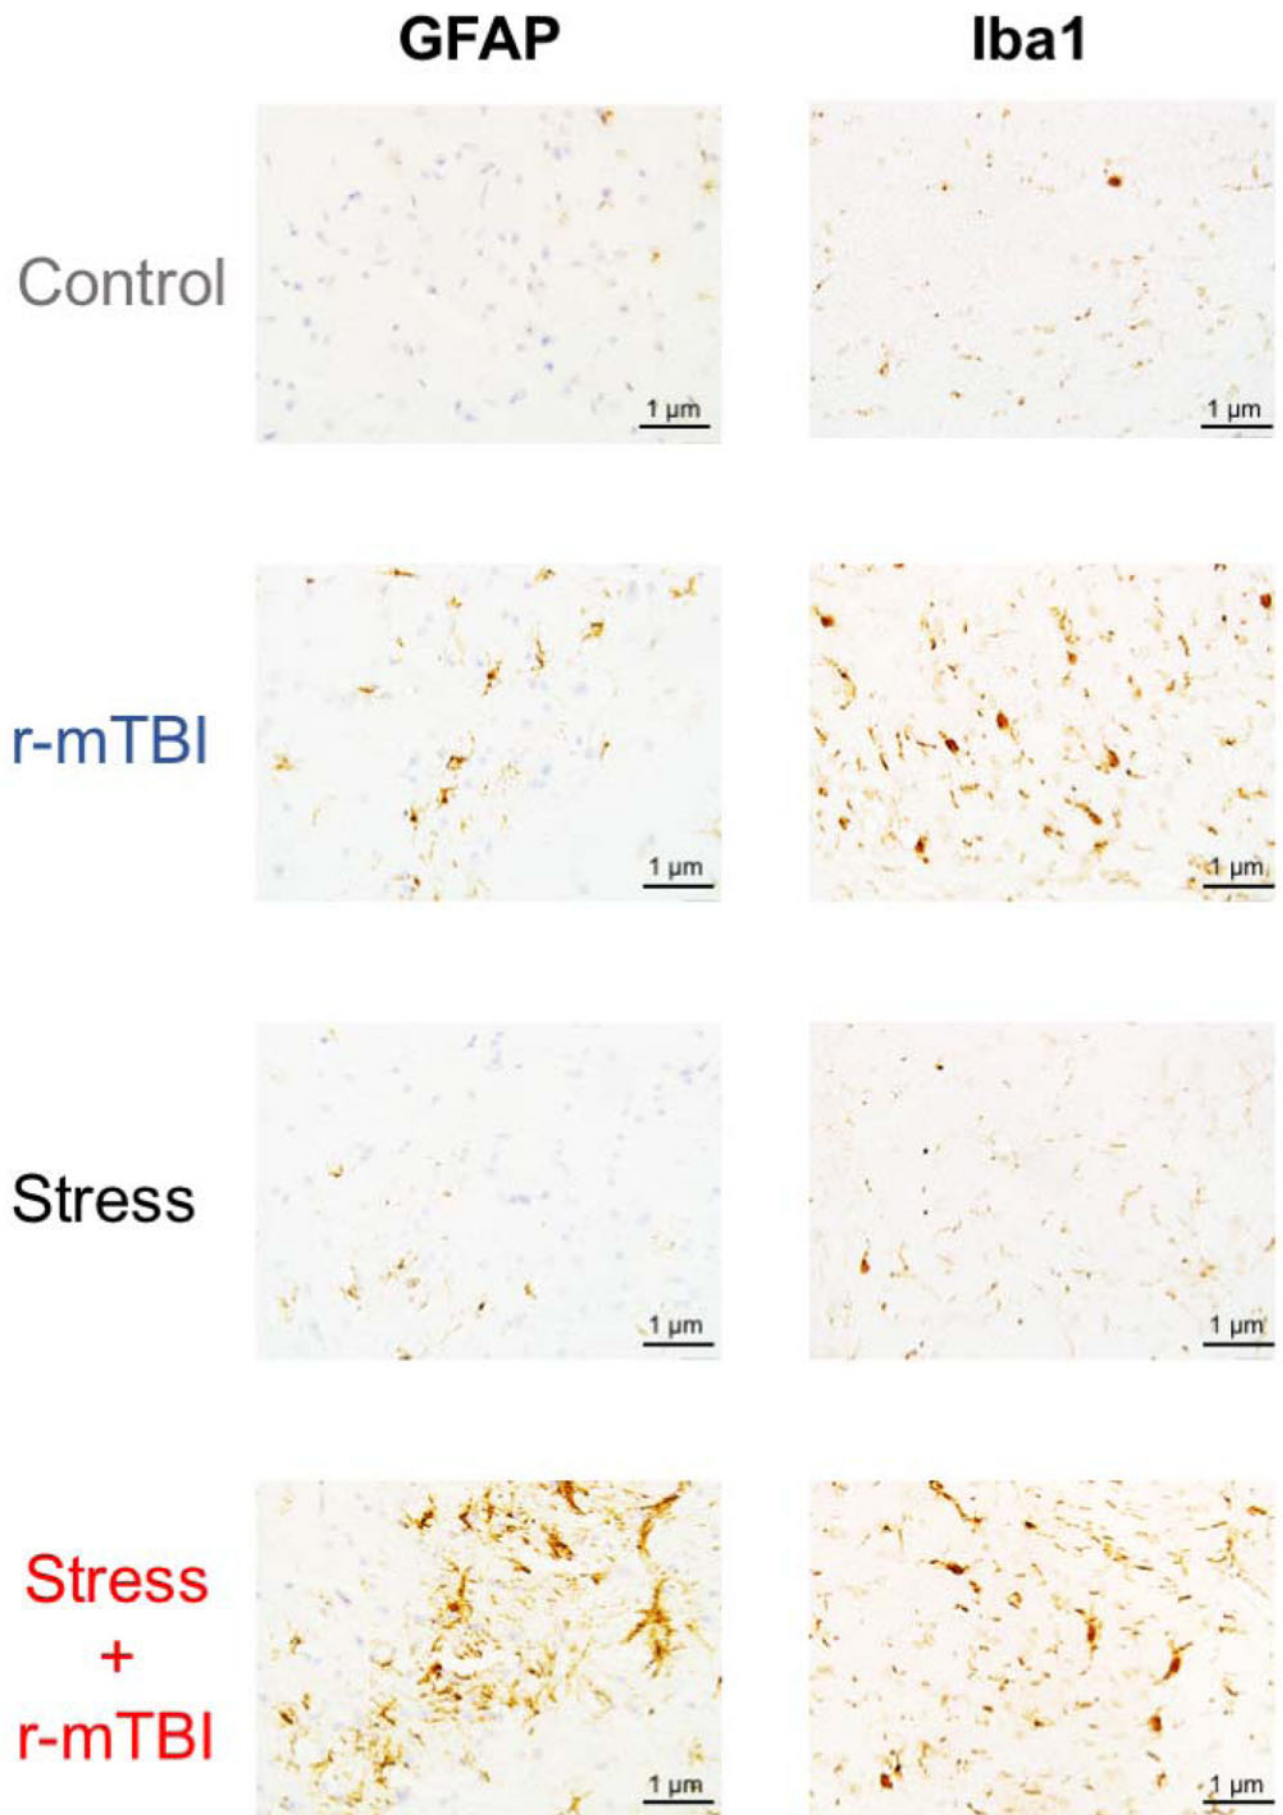

**SUPPLEMENTARY FIG. S7.** Representative filial fibrillary acidic protein (GFAP) and ionized calcium-binding adaptor molecule 1 (Iba1) immunostaining images from each study group.
