# Supplementary material
Source: PubMed Central journal article supplement (PMC7366273)
Supplement: Supp_Fig8.pdf [file Supp_Fig8.pdf]

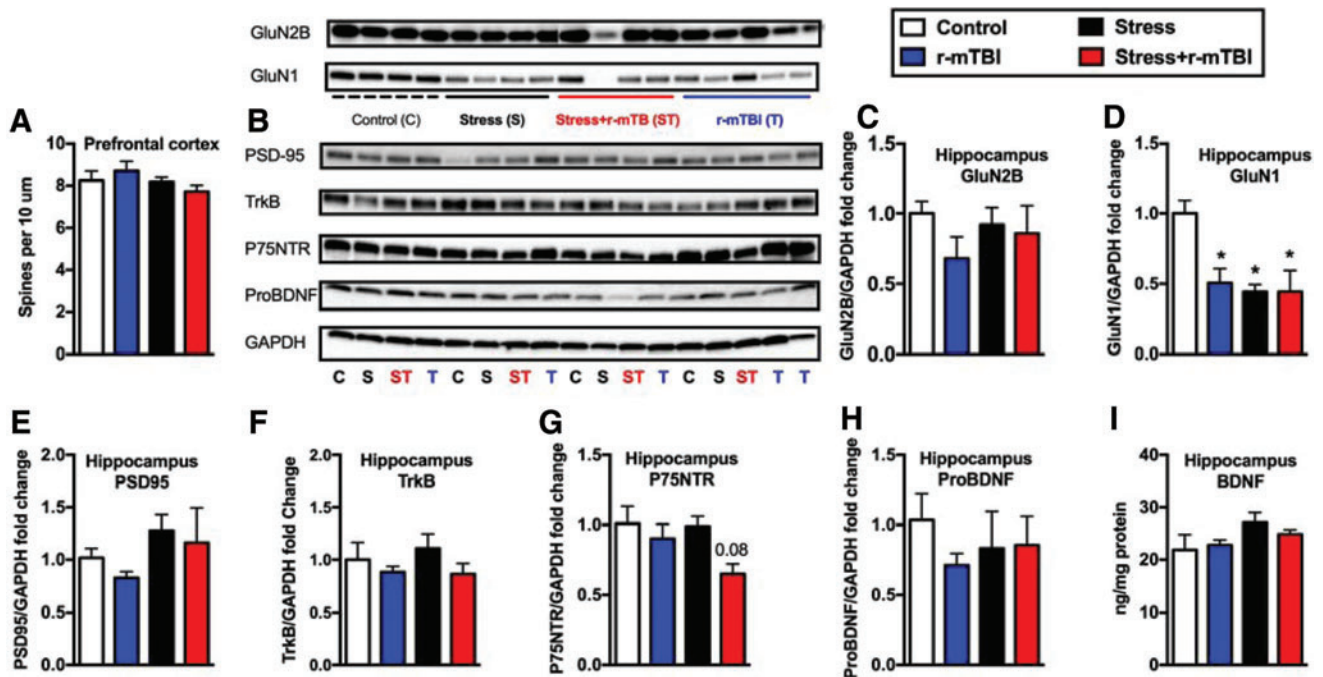

**SUPPLEMENTARY FIG. S8.** Effect of stress and repetitive mild traumatic brain injury (r-mTBI) on a number of hippocampal synaptic plasticity markers and neurotrophic factors and receptors at the acute time-point. Quantification of spine density in the frontal cortex (A). Representative Western blot images for the hippocampal markers at the acute time-point (B). Quantification of GluN2B (C), GluN1 (D), PSD-95 (E), TrkB (F), P75NTR (G), and ProBDNF (H) levels in the hippocampus at the acute time-point. Hippocampal brain-derived neurotrophic factor (BDNF) levels were estimated using a commercial enzyme-linked immunosorbent assay kit (I). Levels of GluN1 were significantly reduced in the stress, r-mTBI and stress+r-mTBI groups compared with the control group, while P75NTR levels trend towards downregulation in the stress+r-mTBI group relative to control animals at the acute time-point. Data in (A, C–I) were analyzed using two-way analysis of variance followed by two-stage linear step-up procedure of Benjamini, Krieger, and Yekutieli to correct for multiple comparisons ( $n=4-5$ ). Statistically significant discoveries versus the control group are denoted by “\*”. In the bottom of panel (B) each study group is labeled as follows; Control (C), stress (S), r-mTBI (T), stress+r-mTBI (ST).
