# Supplementary material
Source: PubMed Central journal article supplement (PMC7366273)
Supplement: Supp_Fig9.pdf [file Supp_Fig9.pdf]

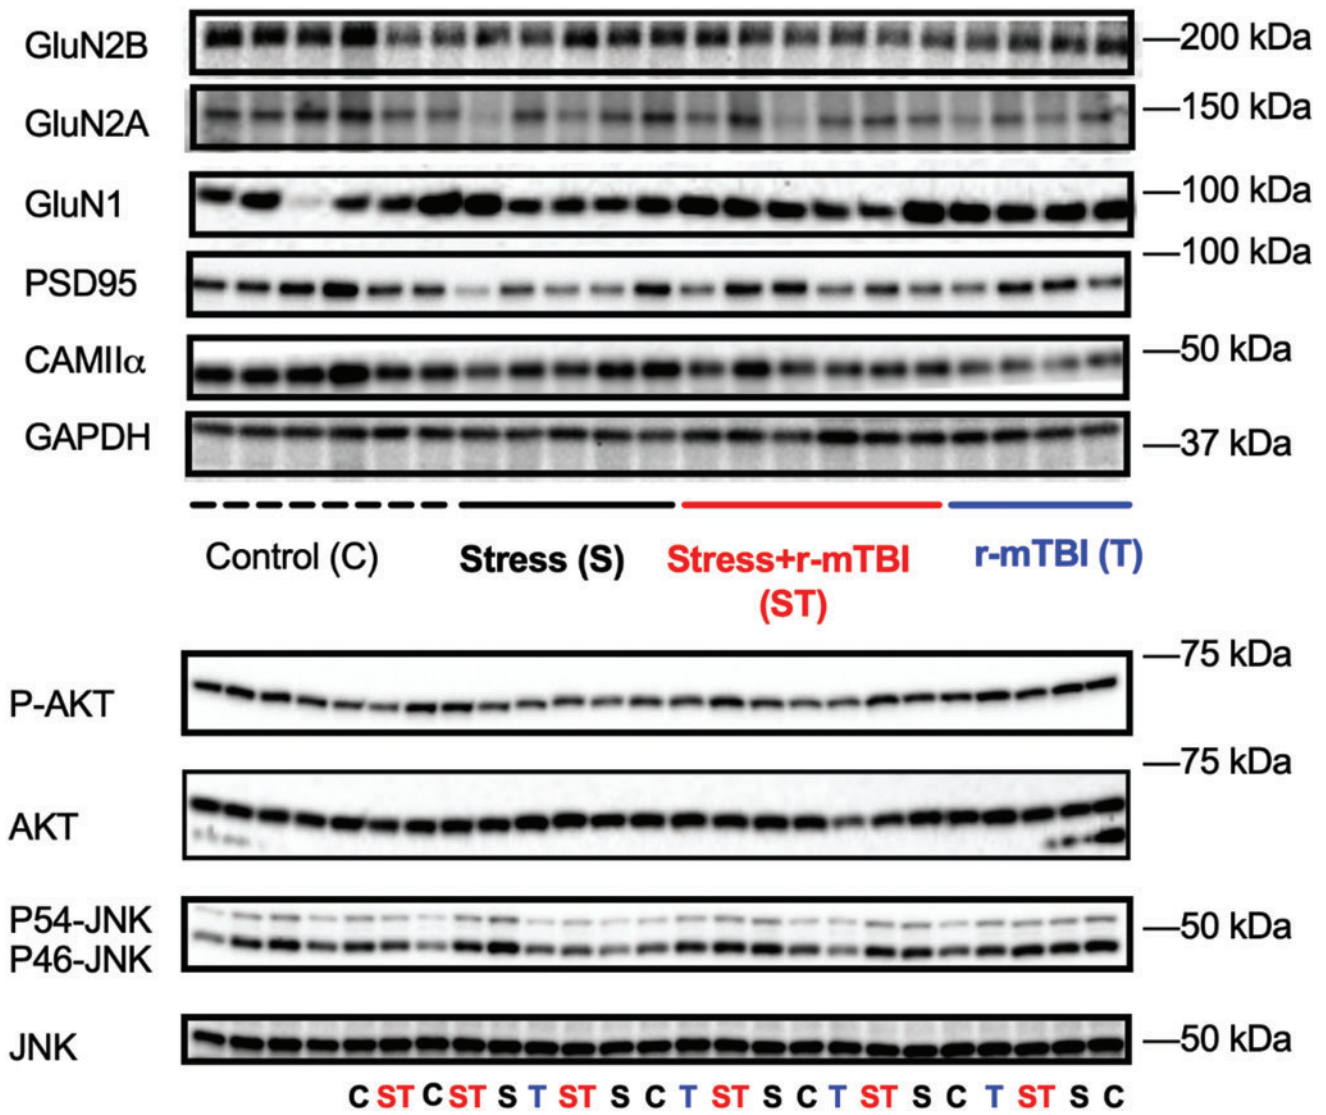

**SUPPLEMENTARY FIG. S9.** Representative Western blot images for a number of synaptic plasticity markers in the hippocampus at 3 months after the second repeated unpredictable stress. Quantification of the western blot images is presented in Figure 8. In the lower panel, each study group is labeled as follows; Control (C), stress (S), repetitive mild traumatic brain injury (r-mTBI; T), stress+r-mTBI (ST).
