# Supplementary material
Source: PubMed Central journal article supplement (PMC7366273)
Supplement: Supp_Tables1-2.pdf [file Supp_Tables1-2.pdf]

SUPPLEMENTARY TABLE S1. SUMMARY OF ANTIBODIES (AB) USED IN WESTERN BLOT EXPERIMENTS

| <i>Target</i>   | <i>1ry ab dilution</i> | <i>Source</i>             | <i>Catalogue #</i> | <i>Host</i> | <i>2ry ab<sup>S</sup> dilution</i> |
|-----------------|------------------------|---------------------------|--------------------|-------------|------------------------------------|
| GR              | 1:1000                 | Cell Signaling Technology | 12041              | Rabbit      | 1:2000                             |
| FKBP51          | 1:1000                 | Abcam                     | ab2901             | Rabbit      | 1:2000                             |
| CRH             | 1:1000                 | Abcam                     | ab184238           | Rabbit      | 1:2000                             |
| TrkB            | 1:2000                 | Abcam                     | Ab187041           | Rabbit      | 1:2000                             |
| P75NTR          | 1:1000                 | Cell Signaling Technology | 8238               | Rabbit      | 1:2000                             |
| ProBDNF         | 1:500                  | Millipore Sigma           | MABN110            | Mouse       | 1:2000                             |
| GluN1           | 1:1000                 | GeneTex                   | GTX133097          | Rabbit      | 1:2000                             |
| GluN2A          | 1:500                  | Thermo Fisher Scientific  | PA5-27921          | Rabbit      | 1:2000                             |
| GluN2B          | 1:1000                 | GeneTex                   | GTX109713          | Rabbit      | 1:2000                             |
| PSD95           | 1:2000                 | Thermo Fisher Scientific  | MA1-046            | Mouse       | 1:2000                             |
| CAMKII $\alpha$ | 1:1000                 | GeneTex                   | GTX27939           | Rabbit      | 1:2000                             |
| AKT             | 1:1000                 | Cell Signaling Technology | 4691               | Rabbit      | 1:2000                             |
| P-AKT           | 1:500                  | Cell Signaling Technology | 4060               | Rabbit      | 1:1000                             |
| P-JNK           | 1:1000                 | Cell Signaling Technology | 4668               | Rabbit      | 1:2000                             |
| JNK             | 1:1000                 | Millipore Sigma           | 06-748             | Rabbit      | 1:1000                             |
| GAPDH           | 1:1000                 | Cell Signaling Technology | 5174               | Rabbit      | 1:2000                             |

<sup>S</sup>Anti-mouse and anti-rabbit secondary antibodies were ordered from Cell Signaling Technology.,

SUPPLEMENTARY TABLE S2. SUMMARY OF ANTIBODIES (AB) USED IN IMMUNOHISTOCHEMISTRY

| <i>Target</i> | <i>1ry ab dilution</i> | <i>Source</i> | <i>Host</i> | <i>2ry ab</i>     |
|---------------|------------------------|---------------|-------------|-------------------|
| GFAP          | 1:10000                | Dako          | Rabbit      | Vector Rabbit kit |
| Iba1          | 1:1000                 | Wako          | Rabbit      | Vector Rabbit kit |
